# Supplementary material
Source: PubMed Central journal article supplement (PMC5404557)
Supplement: AAC.02691-16_zac005176159s1.pdf [file AAC.02691-16_zac005176159s1.pdf]

# Supporting Information

## ***In Vivo* Pharmacokinetic and Pharmacodynamic Profiles of Antofloxacin against *Klebsiella pneumoniae* in a Neutropenic Murine Lung Infection Model**

Yu-Feng Zhou<sup>a,b</sup>, Meng-Ting Tao<sup>a,b</sup>, Wei Huo<sup>a,b</sup>, Xiao-Ping Liao<sup>a,b</sup>, Jian Sun<sup>a,b</sup> and  
Ya-Hong Liu<sup>a,b\*</sup>

<sup>a</sup> National Risk Assessment Laboratory for Antimicrobial Resistance of Animal  
Original Bacteria, South China Agricultural University, Guangzhou, China;

<sup>b</sup> Guangdong Provincial Key Laboratory of Veterinary Pharmaceutics Development  
and Safety Evaluation, South China Agricultural University, Guangzhou, China;

**\* Corresponding author:**

Ya-Hong Liu, PH.D., Laboratory of Veterinary Pharmacology, College of Veterinary  
Medicine, South China Agricultural University, Guangzhou, P. R. China. E-mail:

lyh@scau.edu.cn. Tel: +86-020-85280006; Fax: +86-020-85280006

## Supplementary Materials & Methods

### Sample processing and LC-MS/MS method

A 0.1 mL aliquot of plasma sample or BAL fluid was transferred into a capped centrifuge tube, and then mixed with 0.1 mL of acetonitrile. After vortexing (1 min) and centrifuging ( $12000 \times g$ , 10 min), the supernatant was filtered through a  $0.22 \mu\text{m}$  nylon syringe filter and collected into a sample vial for concentration determination. The drug concentration analyses were performed using a HPLC-ESI-MS/MS system (Agilent 1200 HPLC system; Agilent Technologies, Santa Clara, CA, USA; API 4000 triple quadrupole mass spectrometer; Applied Biosystems, Carlsbad, CA, USA) equipped with a short column (Waters Symmetry C18,  $2.1 \times 50 \text{ mm}$ ,  $3.5 \mu\text{m}$ ). The injection volume was  $5 \mu\text{L}$ , and column temperature should be maintained at  $30 \text{ }^\circ\text{C}$ . The mobile phase consisted of (A) acetonitrile and (B) 0.1% formic acid in water containing 2 mM ammonium acetate using a gradient elution with a flow rate of  $200 \mu\text{L}/\text{min}$ : 0-0.5 min (5% A), 0.5-3.5 min (5-85% A), 3.5-4.0 min (85% A), 4.0-4.5 min (85-5% A), 4.5-11 min (5% A). The total run time was 11 min. The mass conditions were as follows: ionspray voltage, 5000 V; curtain gas, 20 psi; nebulizer gas, 55 psi; collision gas, 20 psi; source temperature,  $600 \text{ }^\circ\text{C}$ . Ion transitions of  $m/z$   $377.2 \rightarrow 333.2$  and  $377.2 \rightarrow 276.1$  were chosen for multiple reaction monitoring (MRM) experiments in positive mode. The correlation coefficients ( $r$ ) were above 0.999 in the linear range of  $0.01$ - $0.5 \mu\text{g}/\text{mL}$ . All samples that had concentrations above  $0.5 \mu\text{g}/\text{mL}$  were diluted proportionally prior to extraction with acetonitrile. The limit of quantification (LOQ) and detection (LOD) were  $0.01$  and  $0.005 \mu\text{g}/\text{mL}$ , respectively. Mean extraction

recoveries from the five replicate assays were  $88.9 \pm 7.96\%$ ,  $91.2 \pm 7.05\%$  and  $96.7 \pm 5.71\%$  at spiked drug concentrations of 0.02, 0.2, and 2  $\mu\text{g/mL}$ , respectively. The intraday coefficients of variation for replicate control samples ( $n = 5$ ) within these concentration ranges varied from 2.2 to 8.7%, and the interday coefficients of variation ranged from 5.9 to 9.7%.

### Supplementary Table

**Table S1.** Protein binding of antofloxacin in murine plasma at three spiked levels <sup>a</sup>

| Spiked levels (mg/L) | Binding (%) <sup>b</sup> |
|----------------------|--------------------------|
| 0.05                 | $18.6 \pm 2.38$          |
| 0.5                  | $20.2 \pm 0.72$          |
| 5                    | $22.3 \pm 1.02$          |

<sup>a</sup> Values are means  $\pm$  standard deviation;  $n = 3$ .

<sup>b</sup> The plasma protein binding of antofloxacin is 20.3% for mice determined in the present study, which was similar to the values of 17.5% for humans (1, 2).

### References

1. **Yu X, Wang G, Chen S, Wei G, Shang Y, Dong L, Schon T, Moradigaravand D, Parkhill J, Peacock SJ, Koser CU, Huang H.** 2016. Wild-Type and Non-Wild-Type *Mycobacterium tuberculosis* MIC Distributions for the Novel Fluoroquinolone Antofloxacin Compared with Those for Ofloxacin, Levofloxacin, and Moxifloxacin. *Antimicrob Agents Chemother* **60**:5232-5237.
2. **Liu L, Pan X, Liu HY, Liu XD, Yang HW, Xie L, Cheng JL, Fan HW, Xiao DW.** 2011. Modulation of pharmacokinetics of theophylline by antofloxacin, a novel 8-amino-fluoroquinolone, in humans. *Acta Pharmacol Sin* **32**:1285-1293.
